# Supplementary material for: Conversion of methanol over 10-ring zeolites with differing volumes at channel intersections: comparison of TNU-9, IM-5, ZSM-11 and ZSM-5
Source: Royal Society of Chemistry journal article supplement (doi:10.1039/c0cp01982h), 2010-12-10
Supplement: c0cp01982h.pdf [file c0cp01982h.pdf]

### TNU-9 (WS201, 202, 204)

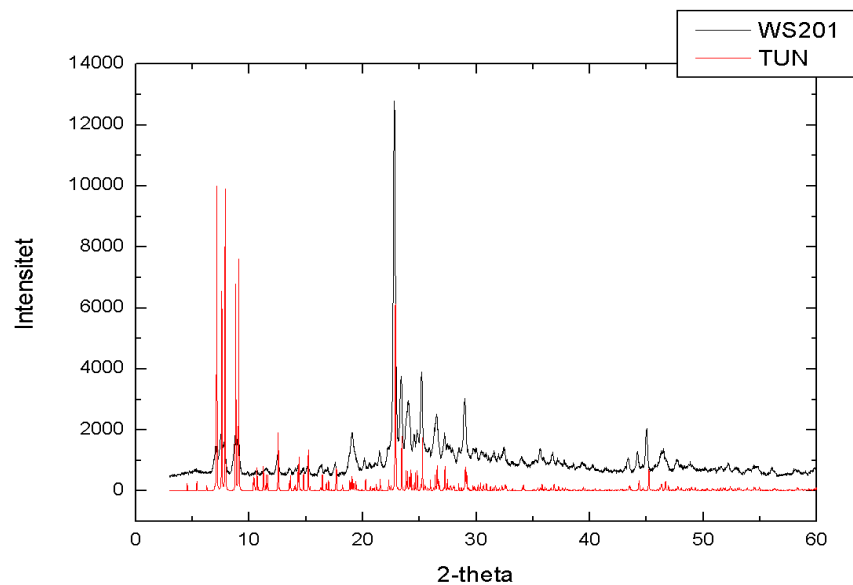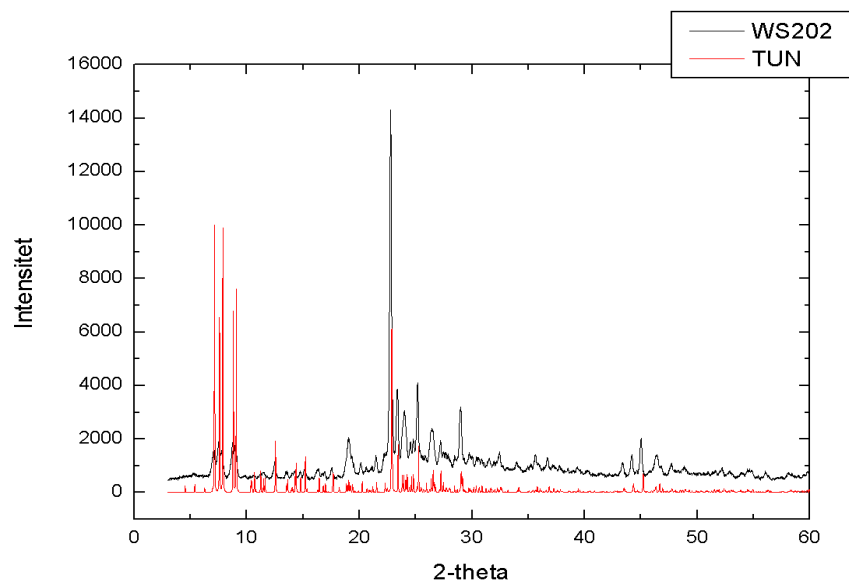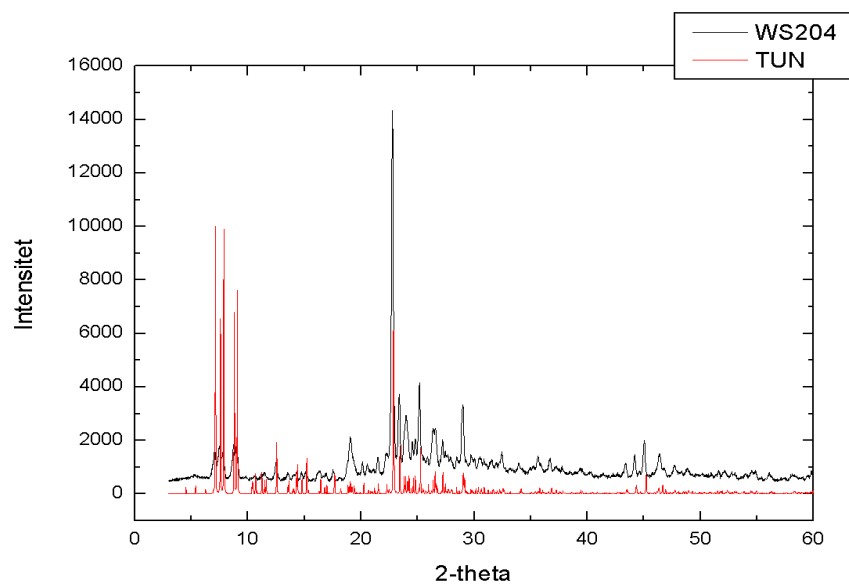

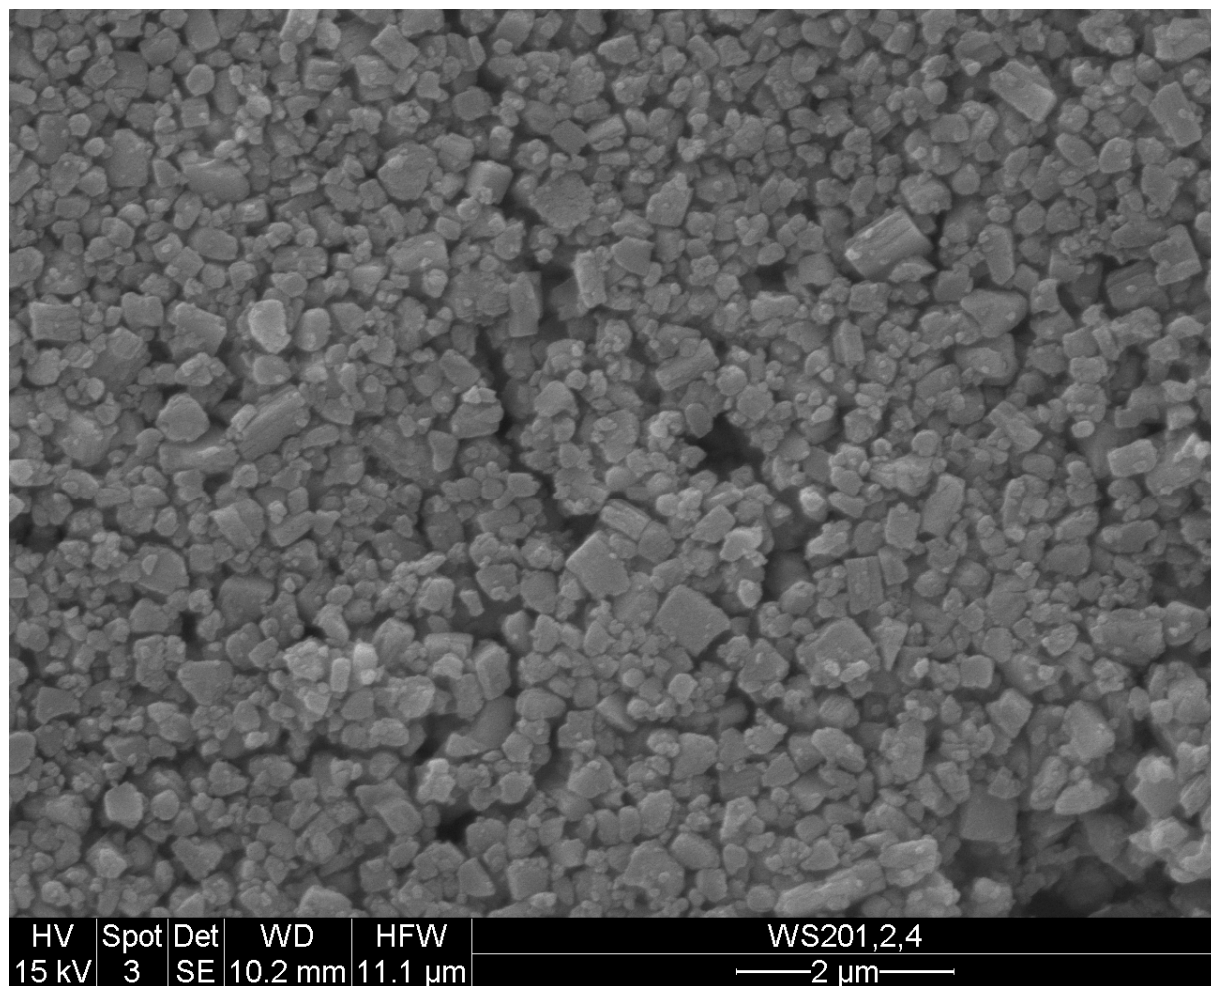

### IM-5 (WS142)

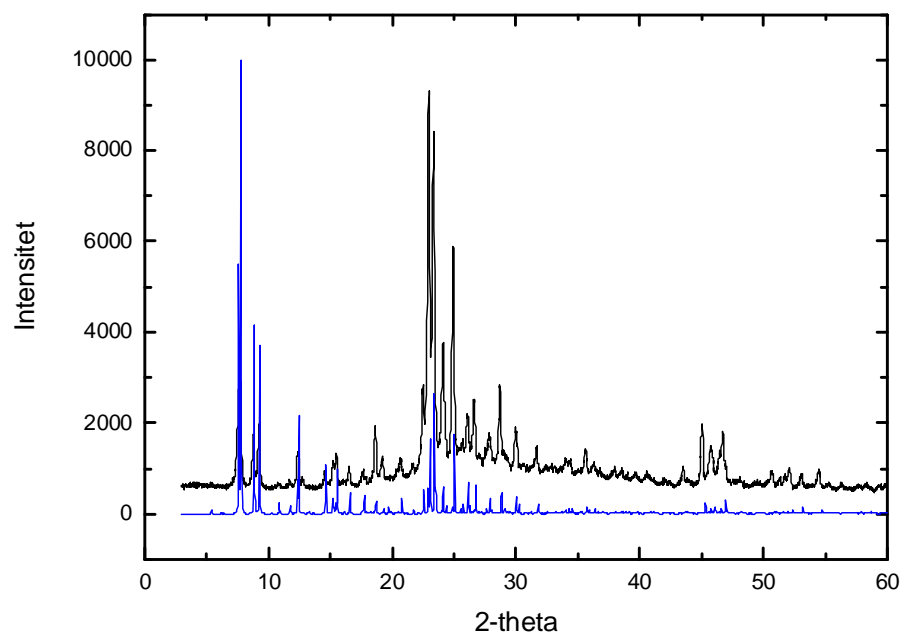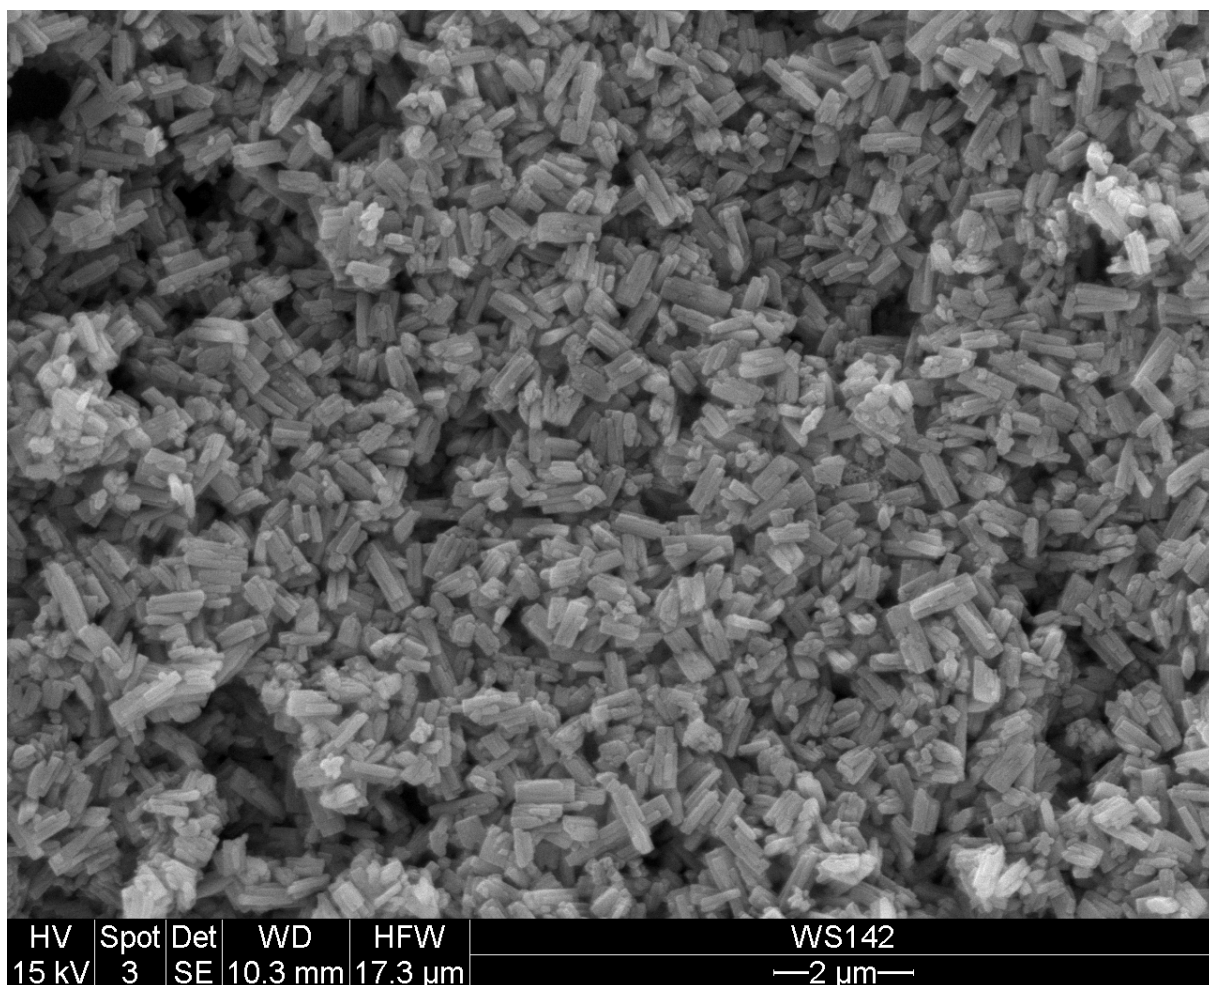

## ZSM-5 (PZ-2/25-H)

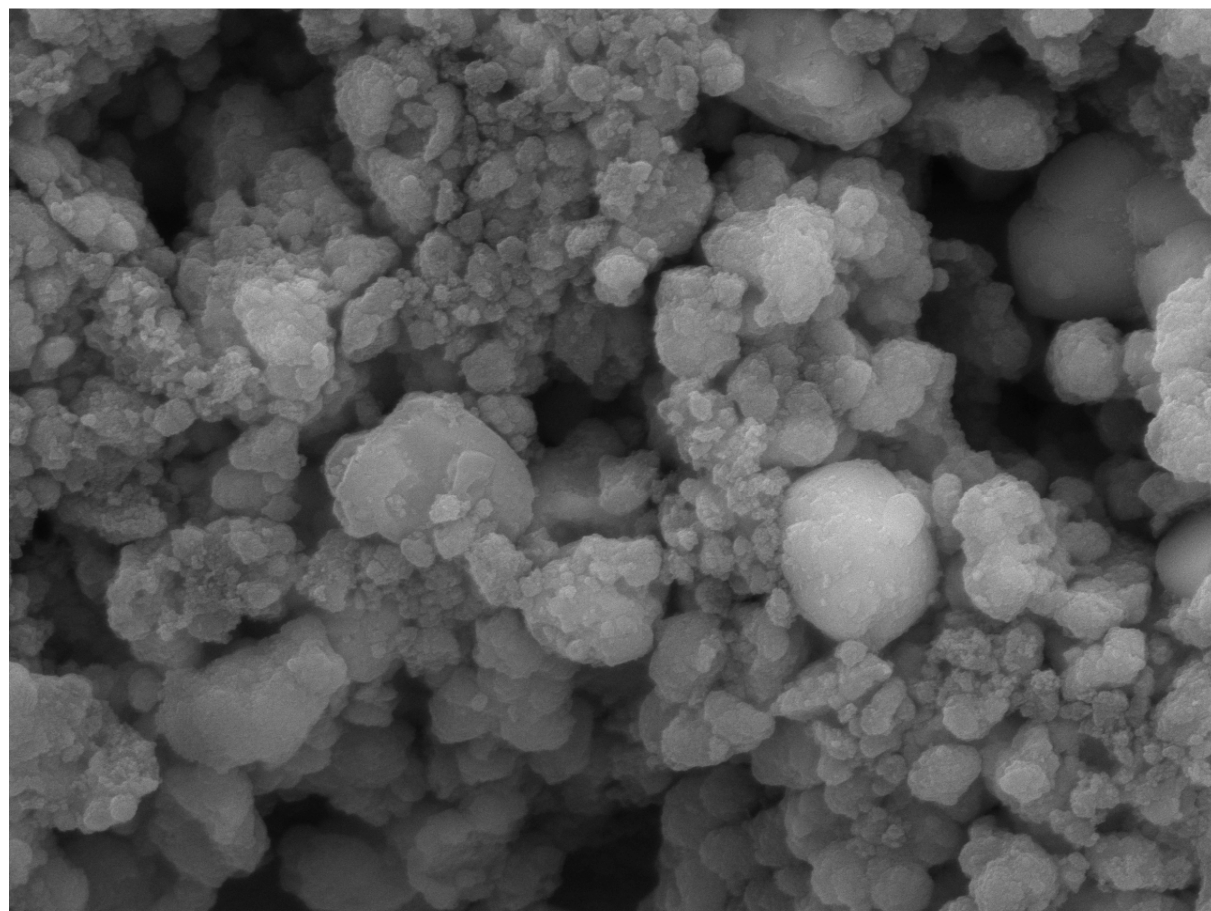

|       |      |     |         |                    |                    |
|-------|------|-----|---------|--------------------|--------------------|
| HV    | Spot | Det | WD      | HFW                | PZ-2/25-H          |
| 15 kV | 3    | SE  | 10.2 mm | 17.3 $\mu\text{m}$ | —2 $\mu\text{m}$ — |

### ZSM-11 (MAKU10z1)

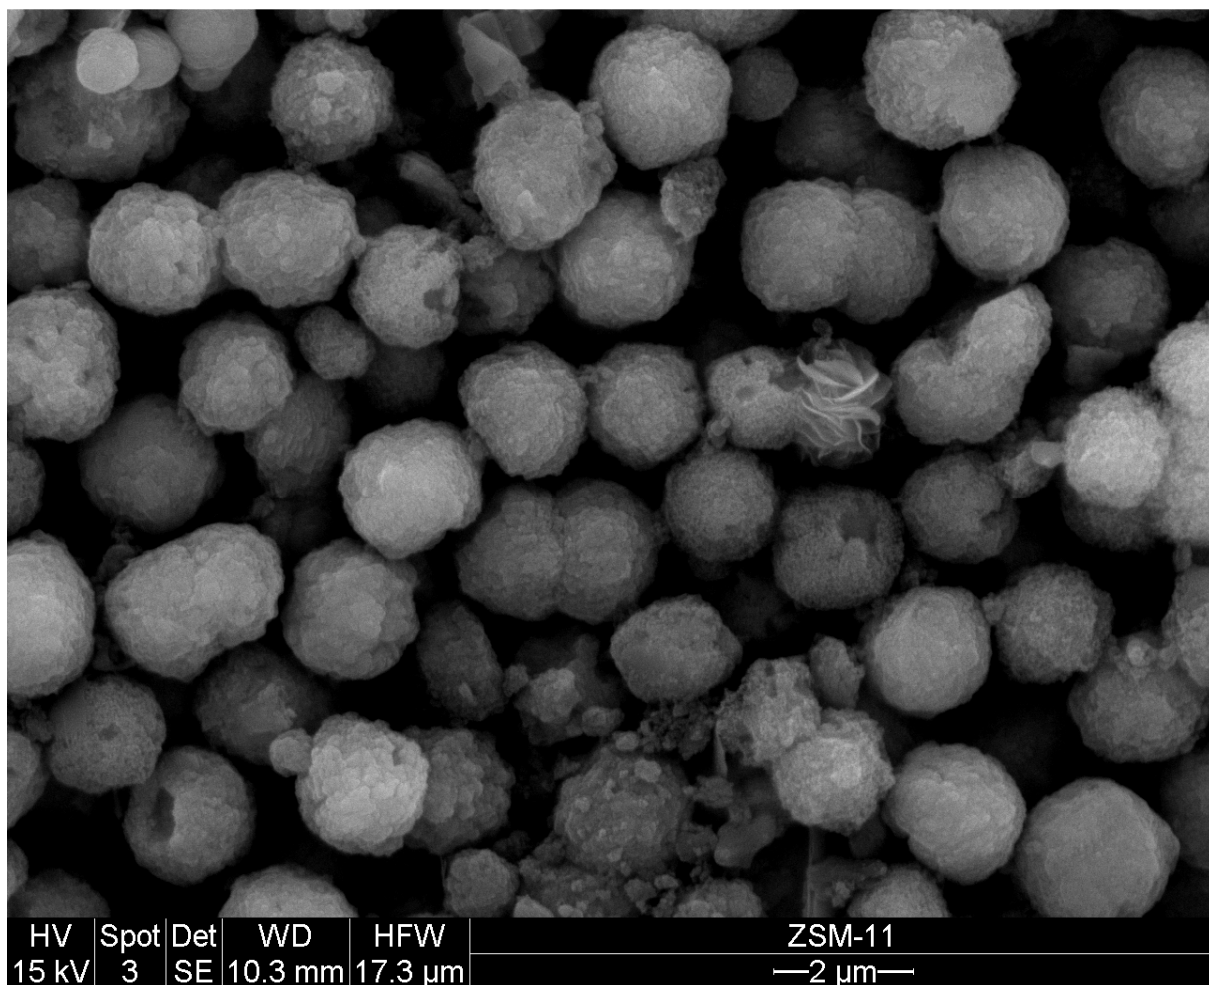

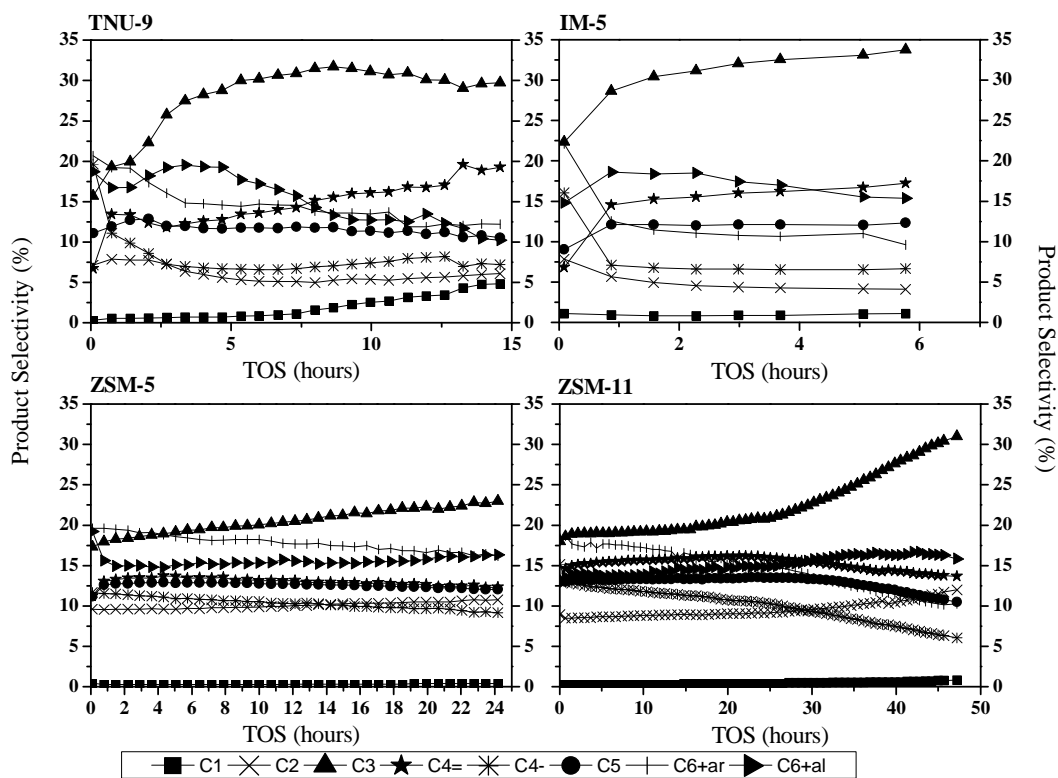

Product selectivities as function of time on stream (hours) for TNU-9 (top left), IM-5 (top right), ZSM-5 (bottom left) and ZSM-11 (bottom right). Conversion of methanol performed at 350 °C and  $WHSV = 9 \text{ h}^{-1}$ .
